# Supplementary material for: High performance of stretchable carbon nanotube–polypyrrole fiber supercapacitors under dynamic deformation and temperature variation
Source: Royal Society of Chemistry journal article supplement (doi:10.1039/c6ta02437h), 2016-01-01
Supplement: c6ta02437h1.pdf [file c6ta02437h1.pdf]

Supporting Information

**High Performance of Stretchable Carbon Nanotube-Polypyrrole Fiber  
Supercapacitors under Dynamic Deformation and Temperature Variation**

F. M. Guo,<sup>a</sup> R. Q. Xu,<sup>a</sup> X. Cui,<sup>a</sup> L. Zhang,<sup>a</sup> K. L. Wang,<sup>a</sup> Y. W. Yao,<sup>b</sup> J. Q. Wei<sup>a\*</sup>

- a. Key Lab for Advanced Materials Processing Technology of Education Ministry; State Key Lab of New Ceramic and Fine Processing; School of Materials Science and Engineering, Tsinghua University, Beijing 100084, P.R. China*
- b. Division of Energy & Environment, Graduate School at Shenzhen, Tsinghua University, Shenzhen 518055, P.R. China*

\*E-mail: [jqwei@tsinghua.edu.cn](mailto:jqwei@tsinghua.edu.cn)

**This file includes:**

**Figs. S1 to S6**

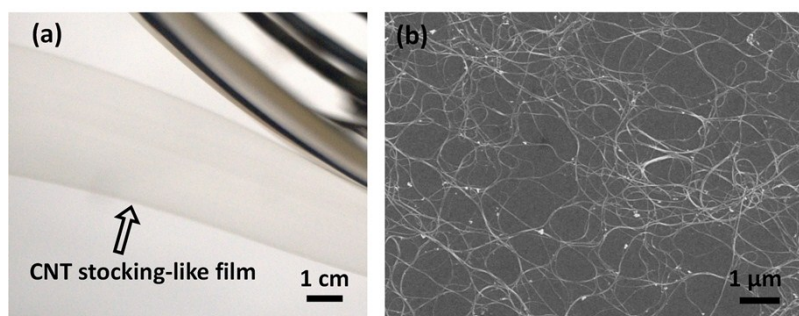

**Figure S1.** (a) Optical and (b) SEM images of the as-prepared stocking-like CNT ultrathin film.

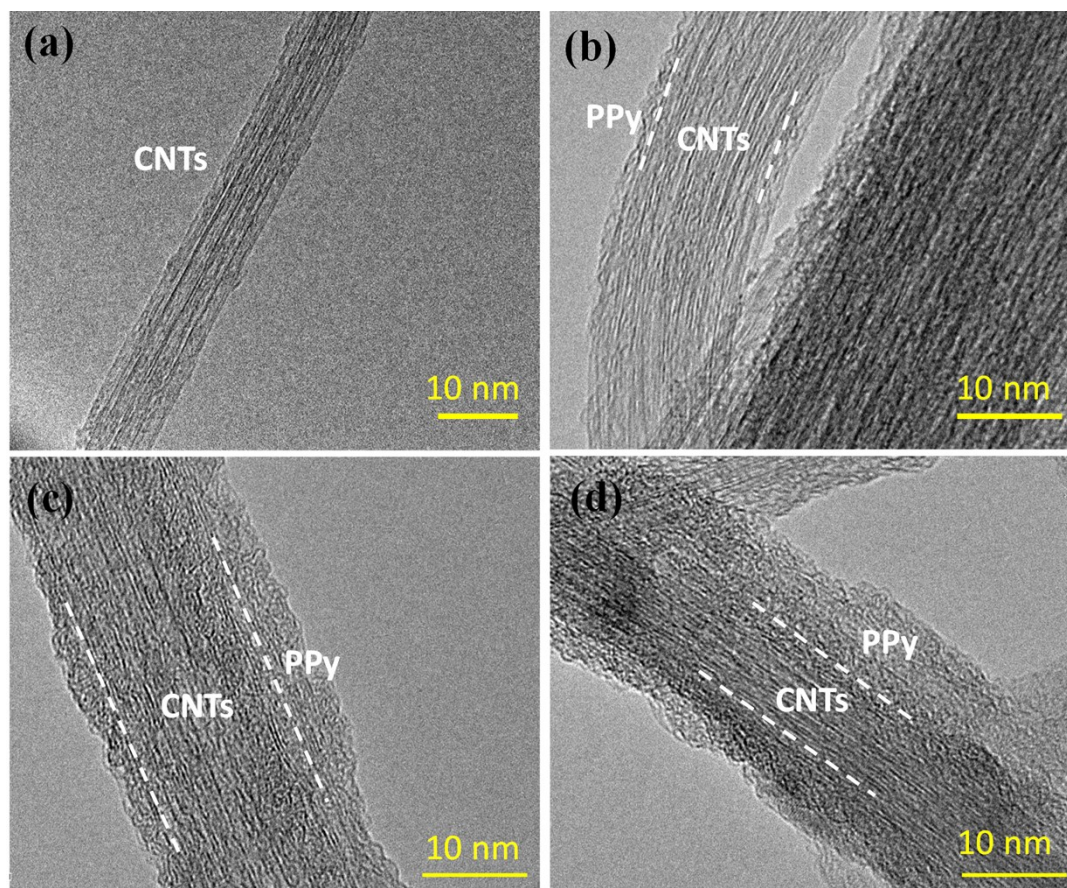

**Figure S2.** TEM images of pure CNT bundles (a), and CNT-PPy composites with polypyrrole content of (b) 35 wt.%, (c) 50wt.%, and (d) 75 wt.%.

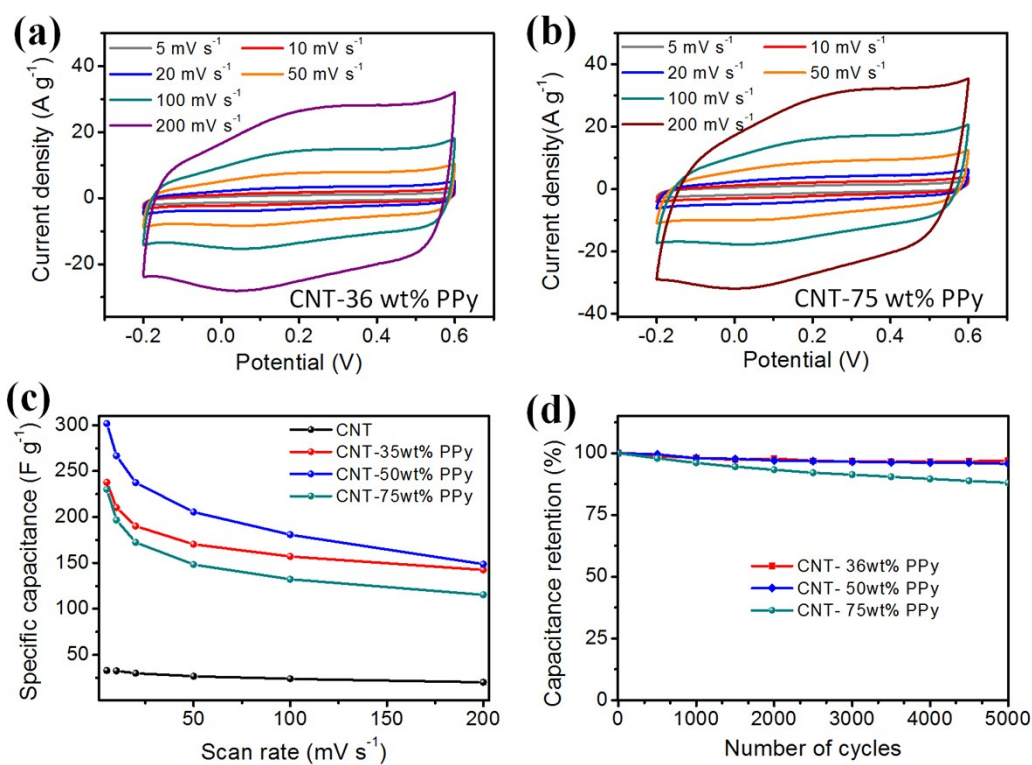

**Figure S3.** Electrochemical performance of CNT-PPy fiber electrodes. CV curves of the CNT-PPy electrodes with PPy content of 35 wt% (a) and 75 wt.% (b). Capacitance retention (c) and cyclic stability at scan rate 200  $\text{mV s}^{-1}$  of different electrodes (d).

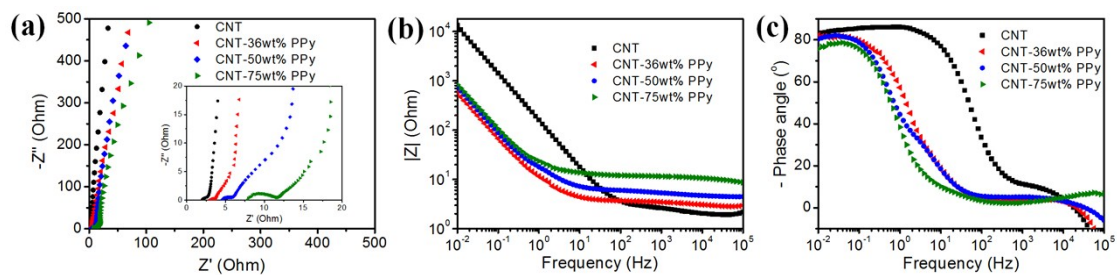

**Figure S4.** EIS spectrum of different fiber electrodes. Nyquist plot (a) and Bode plot (b, c) of the electrodes with different contents of PPy.

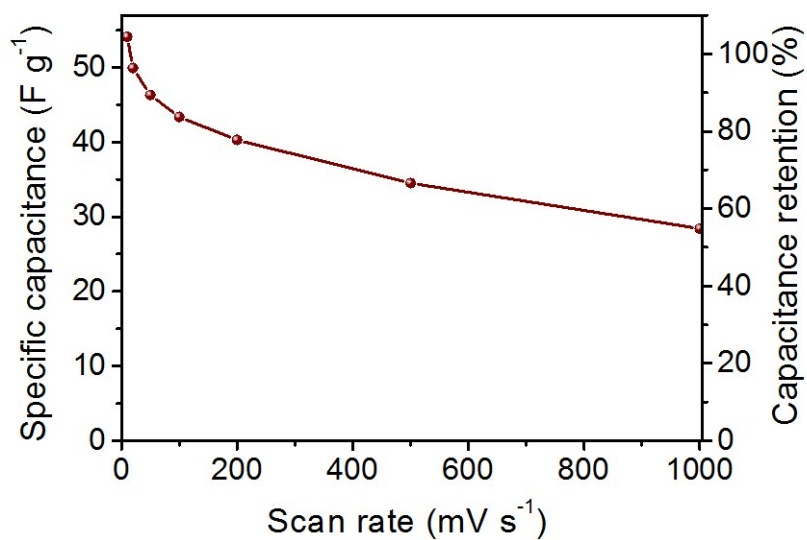

**Figure S5.** Capacitance retention of a FSSC at different scan rates.

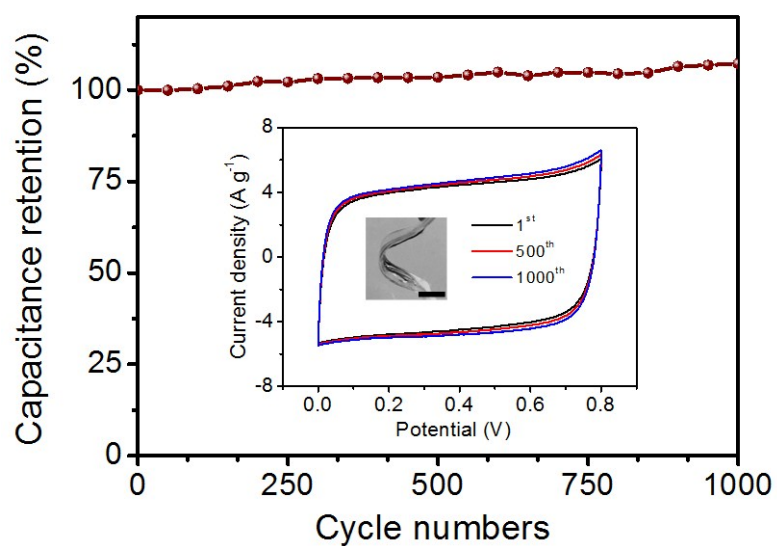

**Figure S6.** Stability test of FSSC under  $90^\circ$  bending for 1000 times at scan rate of  $100 \text{ mV s}^{-1}$ . Inset is a FSSC on PDMS bending to about  $90^\circ$ . Scale bar: 0.5 cm.
